# Supplementary material for: Hard carbon microspheres with bimodal size distribution and hierarchical porosity via hydrothermal carbonization of trehalose
Source: Royal Society of Chemistry journal article supplement (doi:10.1039/d3ra01301d), 2023-01-01
Supplement: d3ra01301d1.pdf [file d3ra01301d1.pdf]

## Supplementary Material:

# Hard Carbon Microspheres with Bimodal Size Distribution and Hierarchical Porosity via Hydrothermal Carbonization of Trehalose

Martin Wortmann <sup>a,\*</sup>, Waldemar Keil <sup>b</sup>, Elise Diestelhorst <sup>c</sup>, Michael Westphal <sup>a</sup>, René Haverkamp <sup>d</sup>, Bennet Brockhagen <sup>c</sup>, Jan Biedinger <sup>a</sup>, Laila Bondzio <sup>a</sup>, Christian Weinberger <sup>b</sup>, Dominik Baier <sup>b</sup>, Michael Tiemann <sup>b</sup>, Andreas Hütten <sup>a</sup>, Thomas Hellweg <sup>d</sup>, Günter Reiss <sup>a</sup>, Claudia Schmidt <sup>b</sup>, Klaus Sattler <sup>e</sup>, Natalie Frese <sup>a,e</sup>

<sup>a</sup> Bielefeld University, Faculty of Physics, Universitätsstraße 25, 33615 Bielefeld, Germany

<sup>b</sup> Paderborn University, Department of Chemistry, Warburger Straße 100, 33098 Paderborn, Germany

<sup>c</sup> Bielefeld University of Applied Sciences, Faculty of Engineering and Mathematics, Interaktion 1, 33619 Bielefeld, Germany

<sup>d</sup> Bielefeld University, Faculty of Chemistry, Physical and Biophysical Chemistry, Universitätsstraße 25, 33615 Bielefeld, Germany

<sup>e</sup> University of Hawaii, Department of Physics and Astronomy, Watanabe Hall, 2505 Correa Road, Honolulu, HI 96822, USA

\* Correspondence: [mwortmann@physik.uni-bielefeld.de](mailto:mwortmann@physik.uni-bielefeld.de)

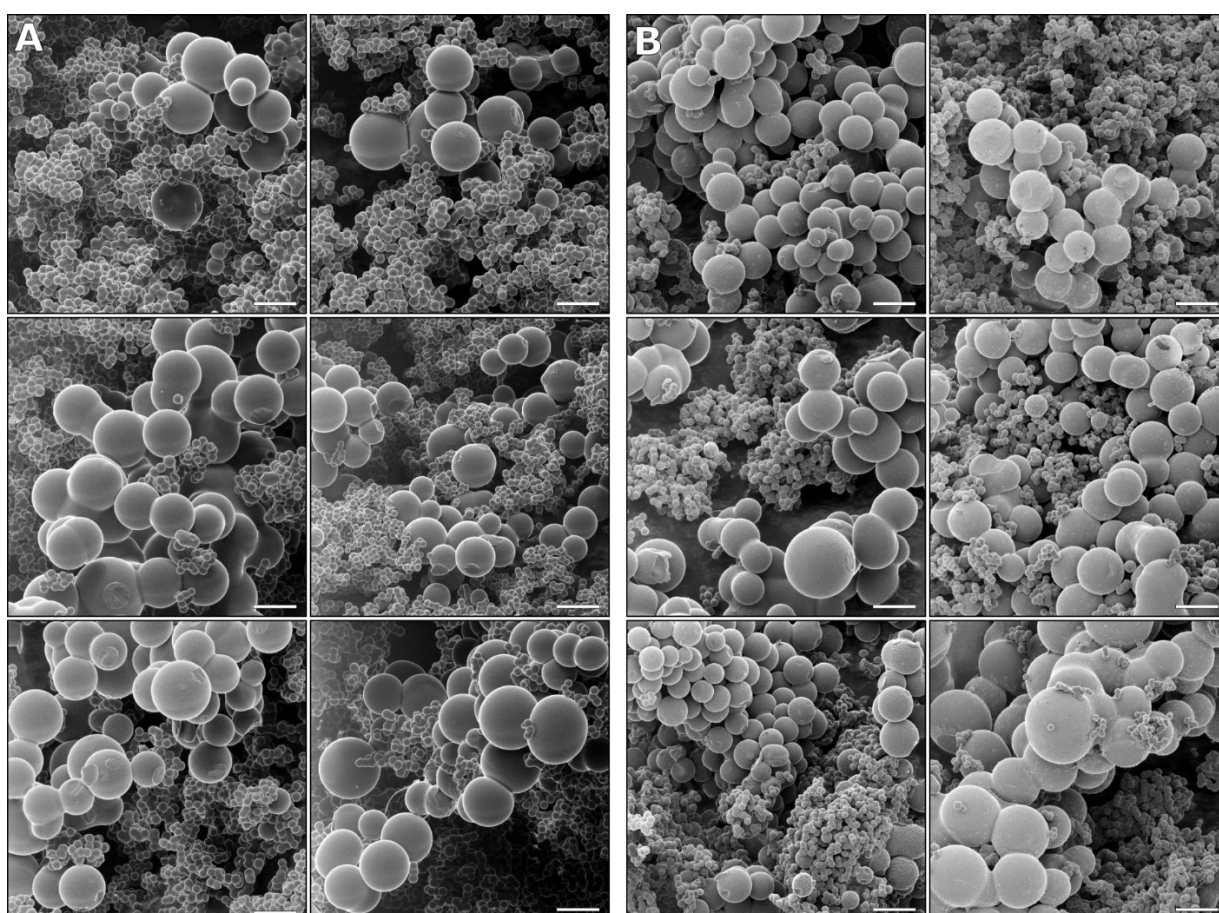

**Supplementary Figure 1:** HIM images of (A) Tre-pMS before and (B) Tre-HCMS after pyrolysis. Scale bars are 10  $\mu\text{m}$ .

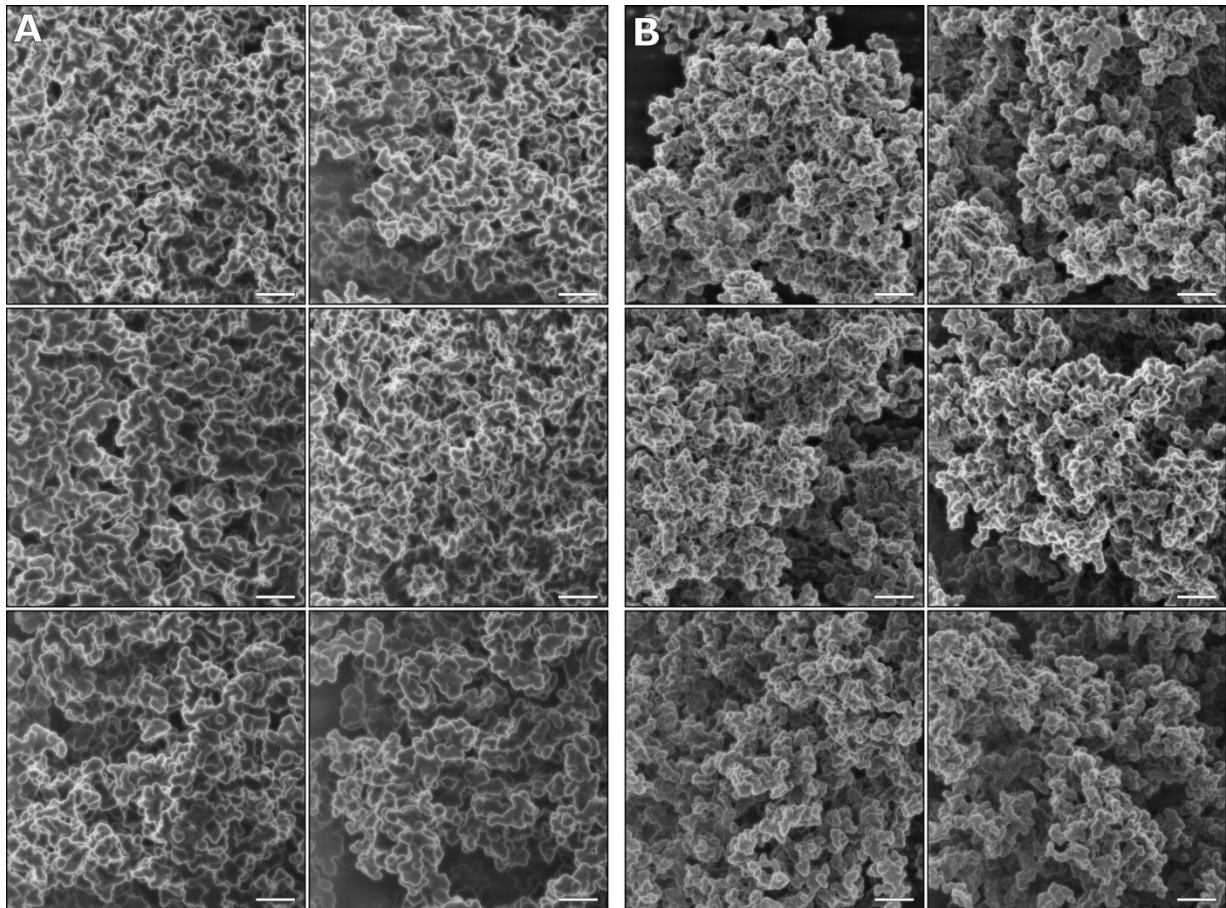

Supplementary Figure 2: HIM images of (A) Glu-pMS before and (B) Glu-HCMS after pyrolysis. Scale bars are 2  $\mu\text{m}$ .

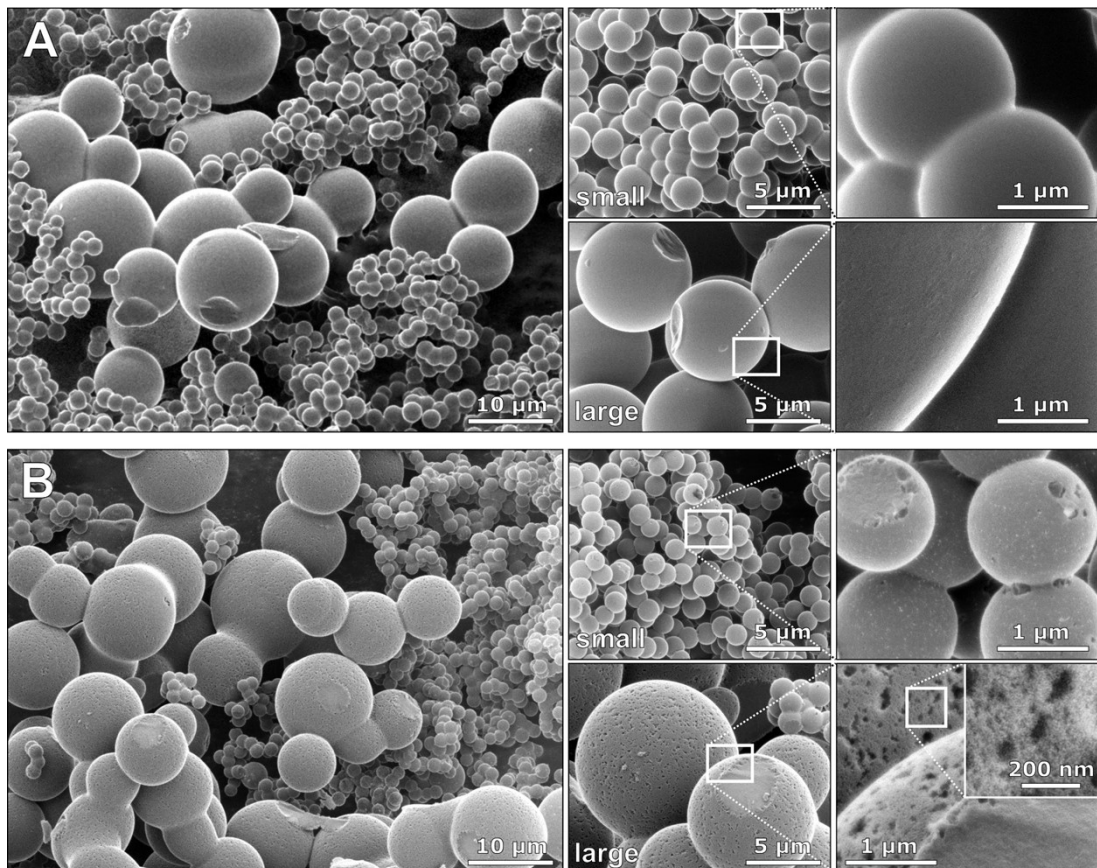

Supplementary Figure 3: Unedited HIM images of (a) Tre-pMS before and (b) Tre-HCMS after pyrolysis.

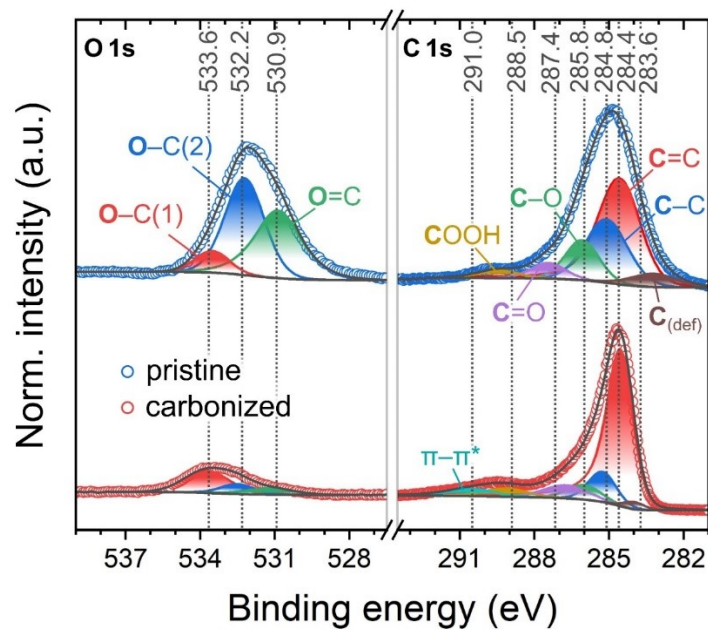

Supplementary Figure 4: XPS core-level spectra of Glu-pMS and Glu-HCMS.

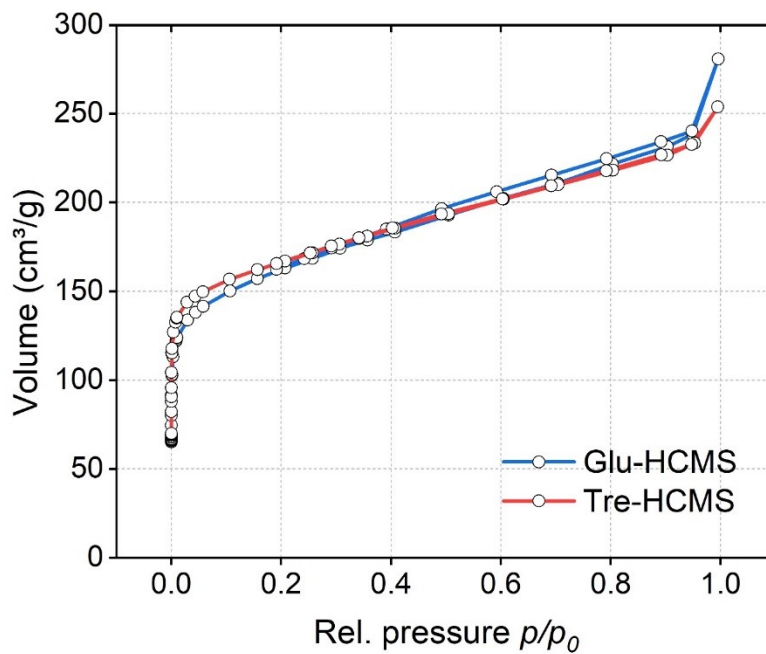

Supplementary Figure 5: Nitrogen adsorption isotherms of Tre-HCMS and Glu-HCMS.

### Supplementary Information on SAXS Measurements:

The SAXS data (Figure 4 in the paper) were deconvoluted according to the Debye-Bueche model [1,2]:

$$I(Q) = I_{porod} + I_{pores} \quad (1)$$

$$I_{porod} = \frac{A}{Q^p} \quad (2)$$

$$I_{pores} = \sum_{i=1}^N \frac{B_i}{(1 + \xi_i^2 \cdot Q^2)^2} \quad (3)$$

$I_{porod}$  and  $I_{pores}$  are the signal contributions of the macroscopic sphere surfaces and the pores within the spheres, respectively. Here, the sum over  $N$  pore sizes is taken to account for a multimodal pore size distribution.  $A$  and  $B_i$  are constants related to the total surface area and the scattering length density contrast of the sample.  $p$  is the Porod exponent, which is related to the smoothness of the sphere surface.  $\xi_i$  is the characteristic length over which electron density variations occur, related to the radius of gyration of the scattering object, i.e. the pores [3].

The scattering vector  $q$  is defined by

$$q = \frac{4\pi}{\lambda} \sin\left(\frac{\theta}{2}\right) \quad (4)$$

where  $\lambda$  is the wavelength and  $\theta$  is the scattering angle.

The average pore diameter  $d$  is given by

$$d = 2 \cdot \xi_i \cdot \sqrt{10}.$$

The fit parameters and the resulting correlation lengths are listed in Supplementary Table 1. Three different pore sizes were found for Tre-HCMS, resulting in two additional parameters  $B_2$  and  $B_3$ .

**Supplementary Table 1:** Fit parameters for the data shown in Figure 4.

| sample   | $A$<br>( $\text{\AA}^{-p}$ ) | $p$ | $B_1$ | $\xi_1$<br>( $\text{\AA}$ ) | $d_1$<br>(nm) | $B_2$ | $\xi_2$<br>( $\text{\AA}$ ) | $d_2$<br>(nm) | $B_3$ | $\xi_3$<br>( $\text{\AA}$ ) | $d_3$<br>(nm) |
|----------|------------------------------|-----|-------|-----------------------------|---------------|-------|-----------------------------|---------------|-------|-----------------------------|---------------|
| Tre-HCMS | 2.3e-06                      | 4   | 0.70  | 2.3                         | 1.45          | 26.54 | 24                          | 15.18         | 25629 | 225                         | 142.30        |
| Glu-HCMS | 3.5e-06                      | 4   | 0.21  | 2.3                         | 1.45          | -     | -                           | -             | -     | -                           | -             |

## Supplementary References

- [1] Debye, P., Anderson Jr, H. R., & Brumberger, H. (1957). Scattering by an inhomogeneous solid. II. The correlation function and its application. *Journal of applied Physics*, 28(6), 679-683. DOI: 10.1063/1.1722830
- [2] Debye, P., & Bueche, A. M. (1949). Scattering by an inhomogeneous solid. *Journal of Applied Physics*, 20(6), 518-525. DOI: 10.1063/1.1698419
- [3] Stevens, D. A., & Dahn, J. R. (2000). An in situ small-angle X-ray scattering study of sodium insertion into a nanoporous carbon anode material within an operating electrochemical cell. *Journal of The Electrochemical Society*, 147(12), 4428. DOI: 10.1149/1.1394081
